# Supplementary material for: Ciprofloxacin-Resistant Salmonella enterica Serovar Kentucky ST198 in Broiler Chicken Supply Chain and Patients, China, 2010–2016
Source: PubMed Central journal article supplement (PMC7022574; doi:10.3390/microorganisms8010140), 2020-01-19
Supplement: microorganisms-08-00140-s001.pdf [file microorganisms-08-00140-s001.pdf]

Table S2. Drug resistance genes and *Salmonella* multidrug-resistant genomic island 1 detected in strains of *Salmonella* Kentucky ST198

| Strain       | Gene about fluoroquinolones  |                    |                                   | SGI     |
|--------------|------------------------------|--------------------|-----------------------------------|---------|
|              | <i>gyrA</i>                  | <i>parC</i>        | PMQR                              |         |
| SH14G2115    | Ser83Phe, Asp87Asn           | Tyr62Ser, Ser85Ile | <i>aac(6')-Ib-cr</i>              |         |
| SH16G2622    |                              | Tyr62Ser           |                                   |         |
| SH11SF316    |                              | Tyr62Ser           | <i>aac(6')-Ib-cr</i>              |         |
| SH14G1773    | Ser83Phe                     | Tyr62Ser           |                                   |         |
| SH13G513     | Ser83Phe                     | Tyr62Ser           |                                   |         |
| YL13T014     | Ser83Phe                     | Tyr62Ser           | <i>aac(6')-Ib-cr, qnrS</i>        |         |
| 2016THC5     | Ser83Phe                     | Tyr62Ser           | <i>aac(6')-Ib-cr</i>              |         |
| SH10SF302    | His78Asn, Ser83Phe           | Tyr62Ser           |                                   |         |
| YL13T055     | Ser83Phe                     | Tyr62Ser           | <i>aac(6')-Ib-cr, qnrS</i>        |         |
| GDYX1403     | Ser83Phe                     | Tyr62Ser           | <i>aac(6')-Ib-cr</i>              |         |
| YL14T335     | Ser83Phe                     | Tyr62Ser           | <i>aac(6')-Ib-cr</i>              |         |
| SH11G1256    | Ser83Phe                     | Tyr62Ser           | <i>aac(6')-Ib-cr, qnrS</i>        |         |
| GDSG1524     |                              | Tyr62Ser           |                                   |         |
| GDYX0712     | Ser83Phe                     | Tyr62Ser           |                                   | SGI1-Ks |
| GDYX0714     | Ser83Phe                     | Tyr62Ser           |                                   |         |
| SH15G1046    | Ser83Phe, Asp87Asn           | Tyr62Ser, Ser85Ile |                                   | SGI1-Ks |
| SH10G616     | Ser83Phe                     | Tyr62Ser           | <i>aac(6')-Ib-cr</i>              |         |
| SH16G2899    | Ser83Phe                     | Tyr62Ser           |                                   |         |
| SH16G3600/#1 | Ser83Phe, Asp87Gly           | Tyr62Ser, Ser85Ile |                                   |         |
| YL13T110     | Ser83Phe                     | Tyr62Ser           | <i>aac(6')-Ib-cr, qnrS</i>        |         |
| SH16G3319    | Ser83Phe, Asp87Asn           | Tyr62Ser, Ser85Ile | <i>aac(6')-Ib-cr</i>              | SGI1-Ks |
| SH16G3599    | Ser83Phe, Asp87Gly           | Tyr62Ser, Ser85Ile |                                   | SGI1-Ks |
| GDBY1128     | Ser83Phe, Asp87Asn           | Tyr62Ser, Ser85Ile | <i>oqxAB, aac(6')-Ib-cr, qnrS</i> |         |
| SH14G1899    |                              | Tyr62Ser           |                                   |         |
| YL14T387     | Ser83Phe, Asp87Asn           | Tyr62Ser, Ser85Ile |                                   |         |
| SH16G1155    | Ser83Phe, Asp87Asn           | Tyr62Ser, Ser85Ile |                                   | SGI1-Ks |
| GDYX1508A    | Ser83Phe                     | Tyr62Ser           | <i>qnrB</i>                       |         |
| GDBY1023     | Ser83Phe, Asp87Asn           | Tyr62Ser, Ser85Ile |                                   | SGI1-Ks |
| SH16G3561    | Ser83Phe, Asp87Asn           | Tyr62Ser, Ser85Ile |                                   | SGI1-Ks |
| SH16G922     | Ser83Phe, Asp87Gly           | Tyr62Ser, Ser85Ile |                                   |         |
| SHG1008      |                              | Tyr62Ser, Ser85Ile |                                   | SGI1-Ks |
| SH16G3800    |                              | Tyr62Ser, Ser85Ile | <i>oqxAB</i>                      |         |
| SH16G1490    | Ser83Phe, Asp87Gly           | Tyr62Ser, Ser85Ile |                                   | SGI1-Ps |
| GDTH1524     | Ser83Phe, Asp87Asn, Asp87Gly | Tyr62Ser, Ser85Ile | <i>aac(6')-Ib-cr, qnrB</i>        |         |
| SH16G762     | Ser83Phe, Asp87Asn           | Tyr62Ser           |                                   | SGI1-Ks |
| YL14T296     | Ser83Phe, Asp87Asn           | Tyr62Ser, Ser85Ile |                                   |         |
| GDTH1504     | Ser83Phe, Asp87Asn           | Tyr62Ser, Ser85Ile |                                   |         |
| GDXY1502     | Ser83Phe                     | Tyr62Ser           |                                   |         |
| SH13G1085    | Ser83Phe, Asp87Asn           | Tyr62Ser, Ser85Ile |                                   |         |
| GDTH1603     | Ser83Phe, Asp87Asn           | Tyr62Ser, Ser85Ile |                                   |         |
| SH12SF063    | Ser83Phe, Asp87Asn           | Tyr62Ser, Ser85Ile |                                   | SGI1-Ks |
| SH13G1441    | Ser83Phe, Asp87Asn           | Tyr62Ser, Ser85Ile |                                   |         |
| YL13T063     | Ser83Phe, Asp87Asn           | Tyr62Ser, Ser85Ile |                                   | SGI1-Ks |
| YL13T071     | Ser83Phe, Asp87Asn           | Tyr62Ser, Ser85Ile |                                   |         |
| YL13T276     | Ser83Phe, Asp87Asn           | Tyr62Ser, Ser85Ile |                                   | SGI1-Ks |
| SH16G2529    | Ser83Phe, Asp87Tyr           | Tyr62Ser, Ser85Ile |                                   |         |
| SH12SF062    | Ser83Phe, Asp87Asn           | Tyr62Ser, Ser85Ile |                                   |         |
| SH13G1438    | Ser83Phe, Asp87Asn           | Tyr62Ser, Ser85Ile |                                   |         |
| GDSZ1607     | Ser83Phe, Asp87Asn           | Tyr62Ser, Ser85Ile | <i>aac(6')-Ib-cr</i>              |         |
| GDSZ1608     | Ser83Phe, Asp87Asn           | Tyr62Ser, Ser85Ile | <i>aac(6')-Ib-cr</i>              |         |
| GDSG1536     | Ser83Phe                     | Tyr62Ser, Ser85Ile | <i>aac(6')-Ib-cr</i>              | SGI1-Ks |
| SH16G2599    | Ser83Phe, Asp87Gly           | Tyr62Ser, Ser85Ile |                                   |         |
| SH16G3509    | Ser83Phe, Asp87Asn           | Tyr62Ser, Ser85Ile |                                   | SGI1-Ks |
| SH12SF228    |                              | Tyr62Ser           |                                   |         |
| SH16G2485    | Ser83Phe, Asp87Asn           | Tyr62Ser, Ser85Ile |                                   |         |
| SH16G256     | Ser83Phe, Asp87Gly           | Tyr62Ser, Ser85Ile |                                   | SGI1-Ks |
| SH16G3589    | Ser83Phe, Asp87Gly           | Tyr62Ser, Ser85Ile |                                   | SGI1-Ks |
| SH16G3634    | Ser83Phe, Asp87Asn           | Tyr62Ser, Ser85Ile |                                   |         |
| SH12SF064    | His78Asn, Ser83Phe, Asp87Asn | Tyr62Ser, Ser85Ile | <i>aac(6')-Ib-cr</i>              |         |
| SH16G3333    | Ser83Phe, Asp87Asn           | Tyr62Ser, Ser85Ile |                                   | SGI1-Ks |
| GDYF1693     | Ser83Phe, Asp87Asn           | Tyr62Ser, Ser85Ile | <i>oqxAB, aac(6')-Ib-cr</i>       | SGI1-Ks |
| YL14T352     | Ser83Phe, Asp87Asn           | Tyr62Ser, Ser85Ile | <i>aac(6')-Ib-cr, qnrB</i>        |         |
| SH16G993/#1  |                              | Ser85Ile           | <i>qnrB</i>                       |         |
